# Supplementary material for: Non-precious cobalt oxalate microstructures as highly efficient electrocatalysts for oxygen evolution reaction
Source: Royal Society of Chemistry journal article supplement (doi:10.1039/c5ta01012h), 2015-01-01
Supplement: c5ta01012h1.pdf [file c5ta01012h1.pdf]

## Electronic Supplementary Information (ESI) for

# Non-precious cobalt oxalate microstructures as highly efficient electrocatalysts for oxygen evolution reaction

Xiaomin Liu, Jing Jiang,\* and Lunhong Ai,\*

Chemical Synthesis and Pollution Control Key Laboratory of Sichuan Province, College of Chemistry and Chemical Engineering, China West Normal University, Shida Road 1, Nanchong 637002, P.R. China.

E-mail: 0826zjjh@163.com (J. Jiang); ah\_aihong@163.com (L. Ai); Tel/Fax: +86-817-2568081

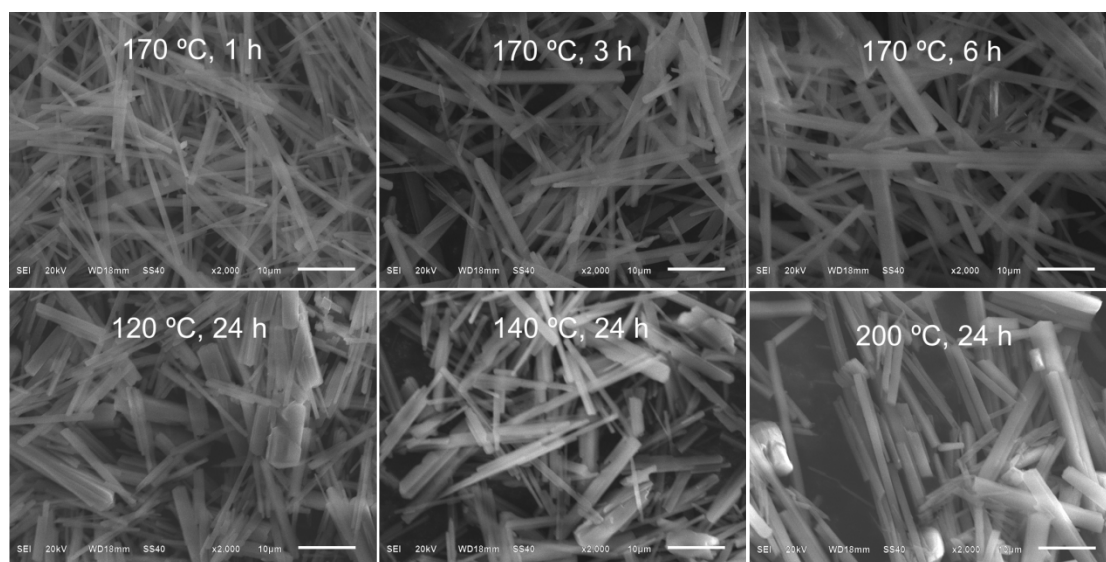

**Fig. S1** SEM images of  $\text{CoC}_2\text{O}_4 \cdot 2\text{H}_2\text{O}$  MRs synthesized in mixture solvent of  $\text{H}_2\text{O}/\text{EG}$  by varying reaction temperature or time, which were observed with a JEOL JSM-6510LV scanning electron microscope.

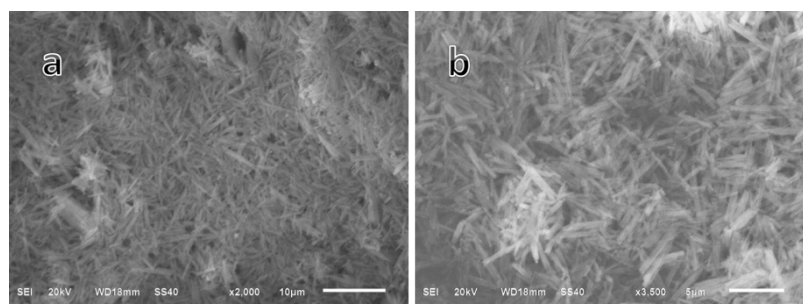

**Fig. S2** SEM images (a,b) of  $\text{CoC}_2\text{O}_4 \cdot 2\text{H}_2\text{O}$  synthesized in pure EG at 170 °C for 24 h.

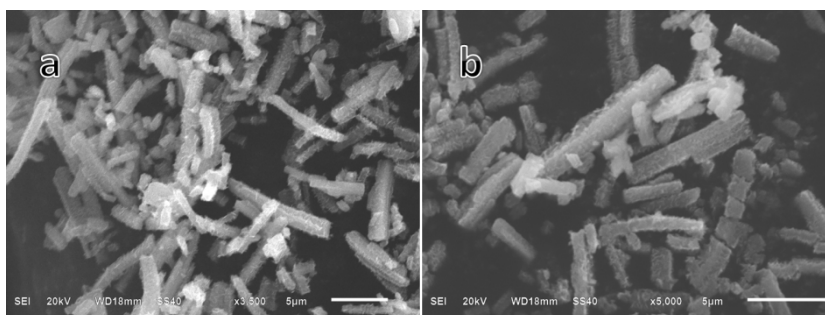

**Fig. S3** SEM images (a,b) of  $\text{CoC}_2\text{O}_4 \cdot 2\text{H}_2\text{O}$  MRs after OER.

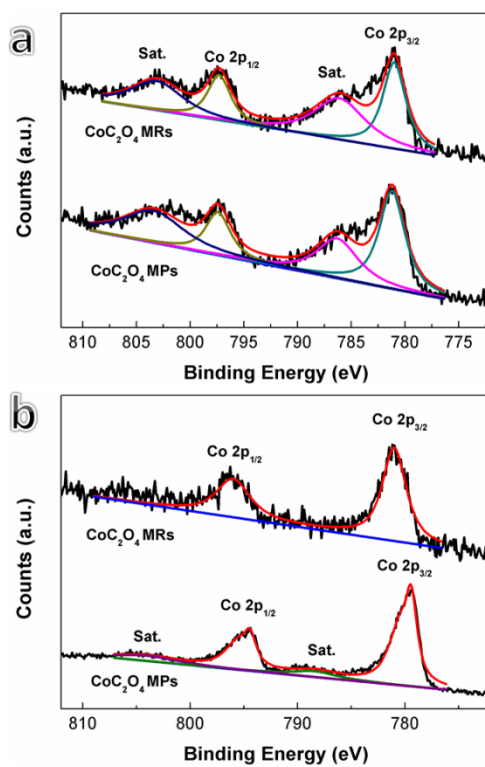

**Fig. S4** Co 2p XPS spectra of  $\text{CoC}_2\text{O}_4 \cdot 2\text{H}_2\text{O}$  MRs and  $\text{CoC}_2\text{O}_4 \cdot 2\text{H}_2\text{O}$  MPs before (a) and after (b) OER.
